# Supplementary material
Source: publisher site journal article supplement (https://www.dovepress.com/article/273396)
Supplement: Supplementary file 1 [file get_supplementary_file.php]

## SUPPORTING INFORMATION

Investigation of the effect of canagliflozin on the disposition index, a marker of pancreatic beta cell function, in patients with type 2 diabetes

| <b>Contents</b>                                                     | <b>Page</b> |
|---------------------------------------------------------------------|-------------|
| <b>Table S1</b> Glimepiride dose adjustment algorithm               | 2           |
| <b>Table S2</b> Changes in disposition index and related parameters | 3           |
| <b>Table S3</b> Vital signs and blood laboratory data               | 5           |
| <b>Table S4</b> Adverse events                                      | 7           |
| <b>Figure S1</b> Patient disposition                                | 8           |
| <b>Figure S2</b> Nocturnal hypoglycemia                             | 9–10        |

**Table S1** Glimpiride dose adjustment algorithm

| <b>Minimum glucose</b> | <b>Maximum glucose</b> |                      |
|------------------------|------------------------|----------------------|
|                        | <b>≤179 mg/dL</b>      | <b>≥180 mg/dL</b>    |
| ≤89 mg/dL              | Decrease by ≥0.25 mg   | Decrease by ≥0.25 mg |
| 90–109 mg/dL           | No change              | No change            |
| 110–129 mg/dL          | No change              | Increase by 0.25 mg  |
| ≥130 mg/dL             | Increase by 0.25 mg    | Increase by 0.5 mg   |

**Table S2** Changes in disposition index and related parameters

| Variable                 |          | Canagliflozin ( <i>n</i> = 19) |                         | Glimepiride ( <i>n</i> = 20) |                         | Intergroup ratio        |                |
|--------------------------|----------|--------------------------------|-------------------------|------------------------------|-------------------------|-------------------------|----------------|
|                          |          | Geometric mean                 | Ratio vs baseline       | Geometric mean               | Ratio vs baseline       | LS mean                 | <i>P</i> value |
| DI                       | Baseline | 0.560<br>(0.427, 0.734)        | –                       | 0.606<br>(0.461, 0.797)      | –                       | –                       | –              |
|                          | Post     | 0.600<br>(0.460, 0.782)        | 1.051<br>(0.824, 1.340) | 0.530<br>(0.394, 0.712)      | 0.890<br>(0.702, 1.129) | 1.180<br>(0.840, 1.659) | 0.330          |
| Matsuda index            | Baseline | 3.468<br>(2.536, 4.742)        | –                       | 3.747<br>(2.817, 4.985)      | –                       | –                       | –              |
|                          | Post     | 3.627<br>(2.715, 4.844)        | 1.042<br>(0.875, 1.240) | 3.473<br>(2.458, 4.907)      | 0.930<br>(0.785, 1.102) | 1.120<br>(0.878, 1.428) | 0.352          |
| IAUC <sub>Ins0–120</sub> | Baseline | 2328<br>(1799, 3012)           | –                       | 2474<br>(1763, 3470)         | –                       | –                       | –              |
|                          | Post     | 2288<br>(1664, 3147)           | 0.977<br>(0.784, 1.217) | 2223<br>(1583, 3122)         | 0.904<br>(0.730, 1.120) | 1.081<br>(0.795, 1.469) | 0.611          |

|                           |          |                |                |                |                |                |       |
|---------------------------|----------|----------------|----------------|----------------|----------------|----------------|-------|
| IAUC <sub>Glu0-120</sub>  | Baseline | 14420          | –              | 15318          | –              | –              | –     |
|                           |          | (13134, 15831) |                | (13333, 17599) |                |                |       |
| IAUC <sub>Glu0-120</sub>  | Post     | 13833          | 0.94           | 14581          | 0.97           | 0.97           | 0.718 |
|                           |          | (12261, 15608) | (0.84, 1.05)   | (12901, 16478) | (0.87, 1.08)   | (0.83, 1.14)   |       |
| IAUC <sub>Ins0-120/</sub> | Baseline | 0.161          | –              | 0.161          | –              | –              | –     |
| IAUC <sub>Glu0-120</sub>  |          | (0.123, 0.211) |                | (0.104, 0.251) |                |                |       |
| IAUC <sub>Glu0-120</sub>  | Post     | 0.165          | 1.025          | 0.153          | 0.946          | 1.083          | 0.668 |
|                           |          | (0.117, 0.234) | (0.784, 1.340) | (0.099, 0.234) | (0.728, 1.229) | (0.745, 1.576) |       |

**Note:** Values in parentheses are the 95% confidence interval.

**Abbreviations:** DI, disposition index; IAUC, incremental area under the curve for glucose or insulin from 0 to 120 min.

**Table S3** Vital signs and blood laboratory data

| Variable                            | Canagliflozin |               | Glimepiride   |               |
|-------------------------------------|---------------|---------------|---------------|---------------|
|                                     | Baseline      | Week 24       | Baseline      | Week 24       |
|                                     | (n = 20)      | (n = 19)      | (n = 20)      | (n = 20)      |
| SBP, mmHg                           | 130.1 (14.0)  | 120.7 (14.4)  | 127.9 (15.7)  | 125.8 (12.7)  |
| DBP, mmHg                           | 79.2 (11.6)   | 79.1 (10.3)   | 79.8 (8.0)    | 81.5 (9.1)    |
| Pulse rate, /min                    | 76.3 (8.7)    | 75.1 (8.4)    | 78.9 (11.9)   | 76.0 (11.3)   |
| WBC, 10 <sup>2</sup> /μL            | 63.8 (12.4)   | 65.7 (16.5)   | 69.9 (23.0)   | 61.5 (17.0)   |
| RBC, 10 <sup>4</sup> /μL            | 466.9 (45.3)  | 496.3 (53.7)  | 472.2 (52.1)  | 472.5 (57.5)  |
| Hemoglobin, g/dL                    | 13.77 (1.39)  | 14.46 (1.64)  | 13.96 (1.90)  | 13.96 (2.09)  |
| Hematocrit, %                       | 41.35 (3.77)  | 44.01 (4.51)  | 41.68 (5.01)  | 41.71 (5.54)  |
| BUN, mg/dL                          | 15.7 (4.1)    | 17.5 (4.0)    | 15.0 (4.4)    | 15.8 (4.5)    |
| Creatinine, mg/dL                   | 0.650 (0.208) | 0.687 (0.227) | 0.657 (0.182) | 0.657 (0.208) |
| eGFR,<br>mL/min/1.73 m <sup>2</sup> | 90.10 (22.56) | 84.75 (22.83) | 90.18 (21.58) | 91.25 (23.64) |
| AST, U/L                            | 26.5 (10.4)   | 22.2 (5.9)    | 29.6 (14.6)   | 35.2 (28.0)   |
| ALT, U/L                            | 28.1 (17.8)   | 21.2 (11.8)   | 30.8 (24.8)   | 36.4 (39.1)   |
| Acetoacetate, μmol/L                | 60.2 (34.2)   | 139.2 (90.7)  | 66.2 (41.2)   | 64.5 (24.1)   |
| 3-Hydroxybutyric<br>acid, μmol/L    | 79.2 (50.4)   | 274.2 (264.9) | 94.7 (97.4)   | 90.8 (66.1)   |
| Total ketone bodies,<br>μmol/L      | 139.4 (81.7)  | 413.4 (352.7) | 160.9 (137.6) | 155.3 (87.6)  |

**Note:** Values are mean (SD).

**Abbreviations:** SBP, systolic blood pressure; DBP, diastolic blood pressure; WBC, white blood cell count; RBC, red blood cell count; BUN, blood urea nitrogen; eGFR, estimated glomerular filtration rate; AST, aspartate aminotransferase; ALT, alanine aminotransferase.

**Table S4** Adverse events

|                                          | <b>Canagliflozin</b> | <b>Glimepiride</b> |
|------------------------------------------|----------------------|--------------------|
|                                          | <b>(n = 20)</b>      | <b>(n = 20)</b>    |
| AEs                                      | 20 (100.0%)          | 18 (90.0%)         |
| SAEs                                     | 1 (5.0%)             | 1 (5.0%)           |
| ADRs                                     | 15 (75.0%)           | 15 (75.0%)         |
| AEs in $\geq 2$ patients in either group |                      |                    |
| Hypoglycemia                             | 12 (60.0%)           | 14 (70.0%)         |
| Blood ketone body increased              | 6 (30.0%)            | 0 (0.0%)           |
| Nasopharyngitis                          | 3 (15.0%)            | 5 (25.0%)          |
| Back pain                                | 2 (10.0%)            | 3 (15.0%)          |
| Pain in extremity                        | 2 (10.0%)            | 2 (10.0%)          |
| Pruritus genital                         | 3 (15.0%)            | 0 (0.0%)           |
| Oropharyngeal pain                       | 0 (0.0%)             | 3 (15.0%)          |
| Abdominal discomfort                     | 2 (10.0%)            | 1 (5.0%)           |
| Cystitis                                 | 2 (10.0%)            | 0 (0.0%)           |

**Note:** Values are *n* (%).

**Abbreviations:** AE, adverse event; SAE, serious adverse event; ADR, adverse drug reaction.

**Figure S1** Patient disposition

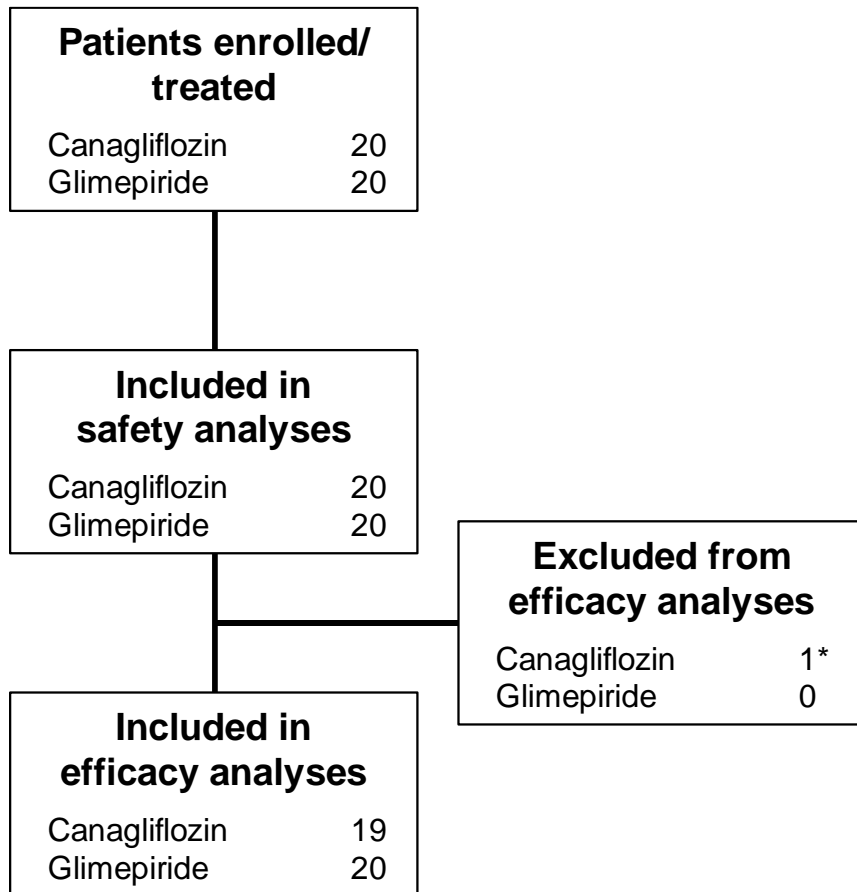

**Note:** \*One patient was found to meet an exclusion criterion (patients diagnosed with a malignant tumor or patients suspected of a malignant tumor) and was withdrawn from the study.



**Figure S2** Nocturnal hypoglycemia. Proportion of time with glucose levels  $\leq 70$  mg/dL ( $\leq 3.89$  mmol/L, **a**) or  $< 54$  mg/dL ( $< 3.00$  mmol/L, **b**) between 0:00 and 05:59.

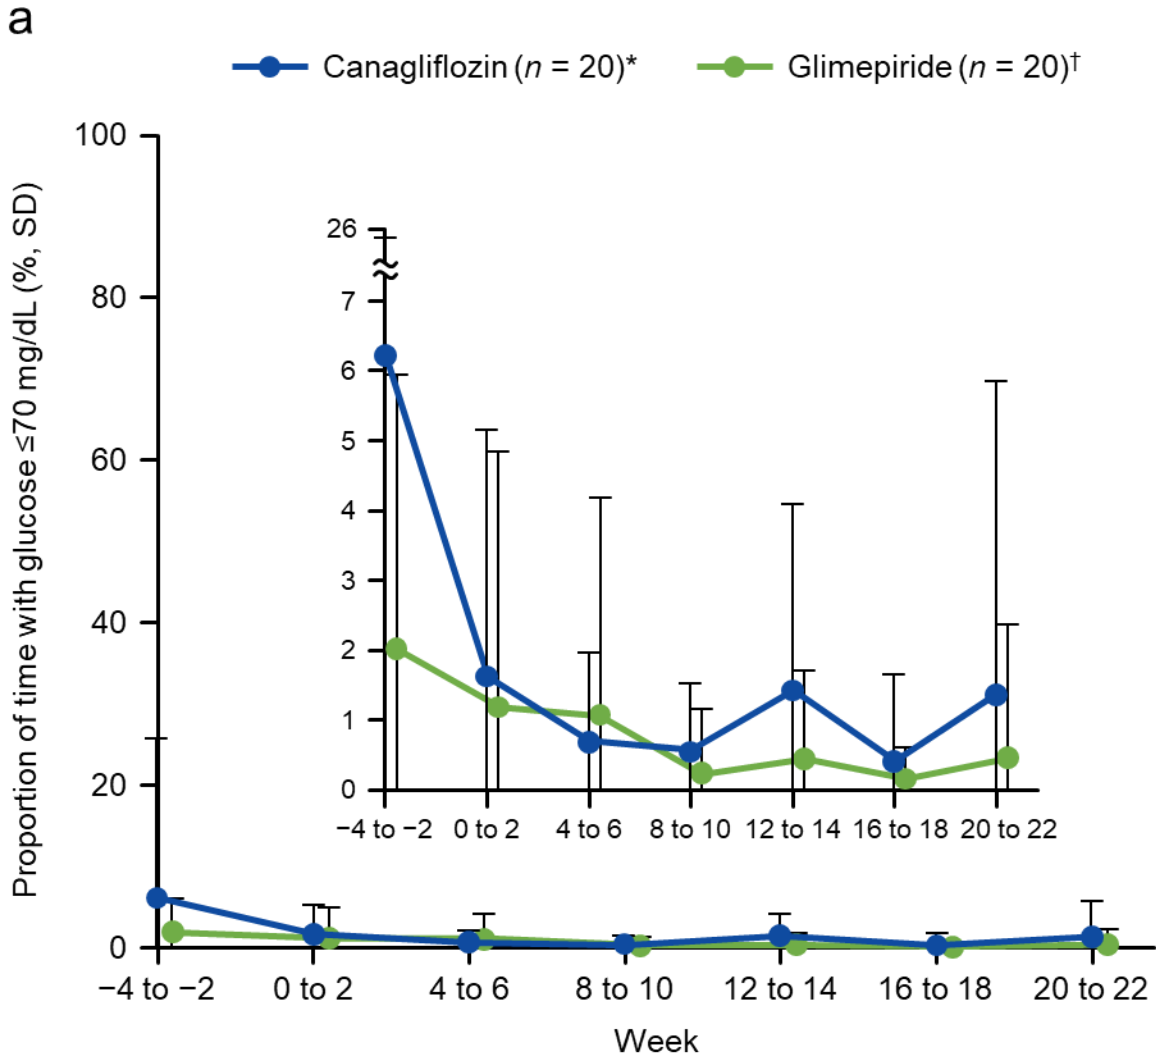

b

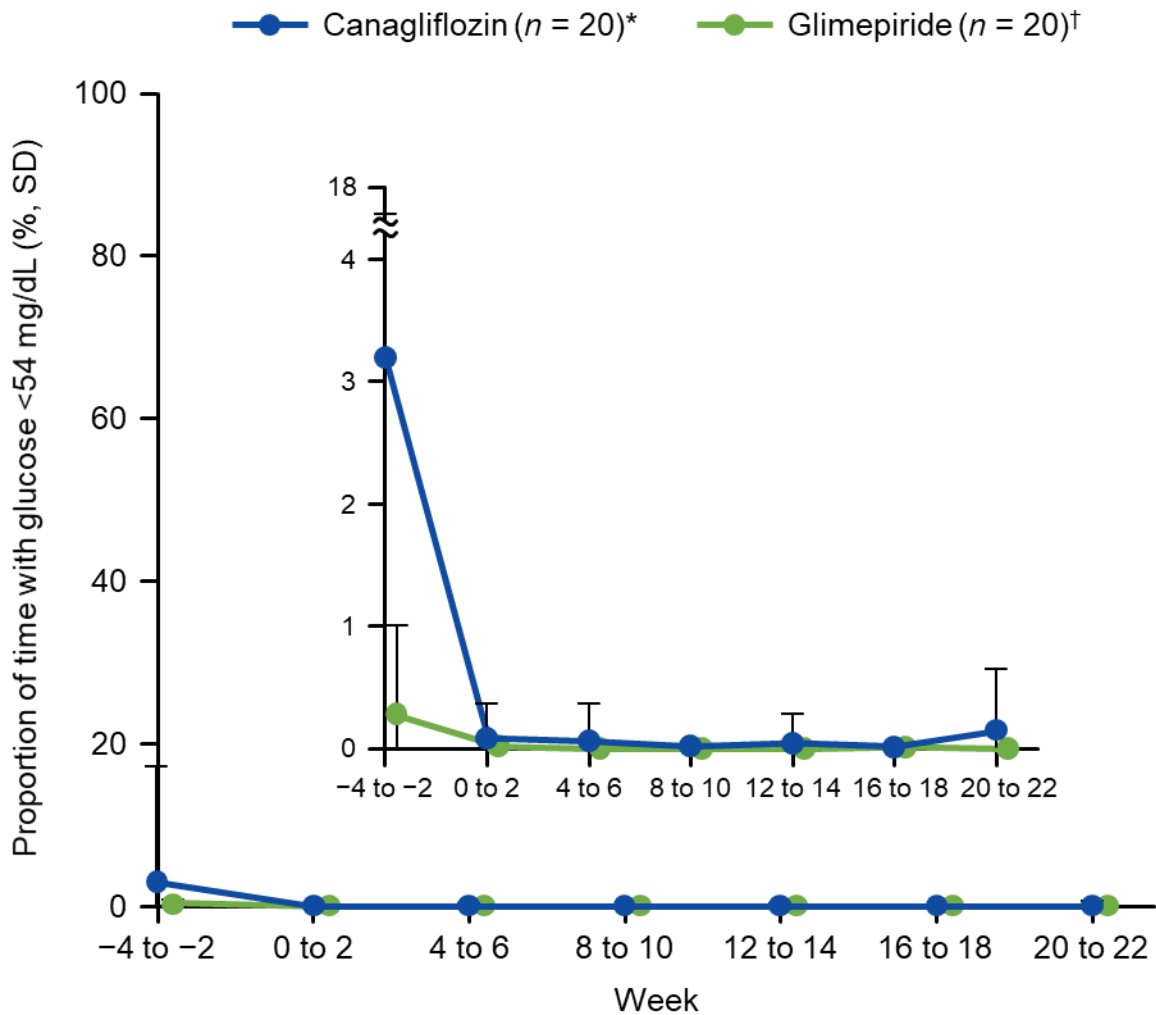

**Note:** The insets show a magnified axis for the proportion of time. Statistical comparisons of the two groups were not performed. Canagliflozin group  $n = 20$ , glimepiride group  $n = 20$ , unless otherwise indicated. \*Canagliflozin  $n = 18$  at week 24; †glimepiride,  $n = 19$  at week 12.

**Abbreviations:** SD, standard deviation.
